# Supplementary material for: CLOCK and BMAL1 stabilize and activate RHOA to promote F-actin formation in cancer cells
Source: PubMed Central journal article supplement (PMC6172197; doi:10.1038/s12276-018-0156-4), 2018-10-04
Supplement: 12276_2018_156_MOESM1_ESM.pdf [file 12276_2018_156_MOESM1_ESM.pdf]

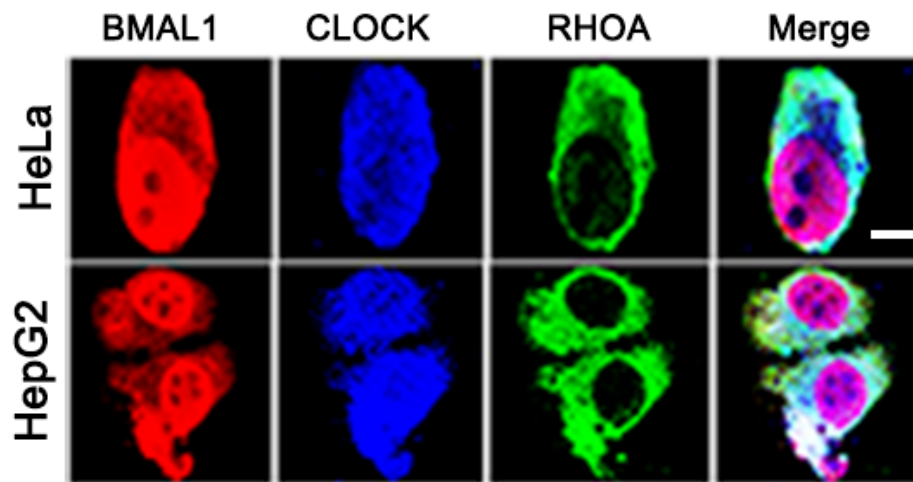

**Figure S1.** Immunofluorescent staining of endogenous BMAL1 (Red), CLOCK (Blue) and RHOA (Green) in HeLa cells. The scale bars represent 5 $\mu$ m.
